# Supplementary material for: Paper-Cut Flexible Multifunctional Electronics Using MoS2 Nanosheet
Source: MDPI journal article supplement (doi:10.3390/nano9070922), 2019-06-26
Supplement: s1 [file s1]

## Supporting Information

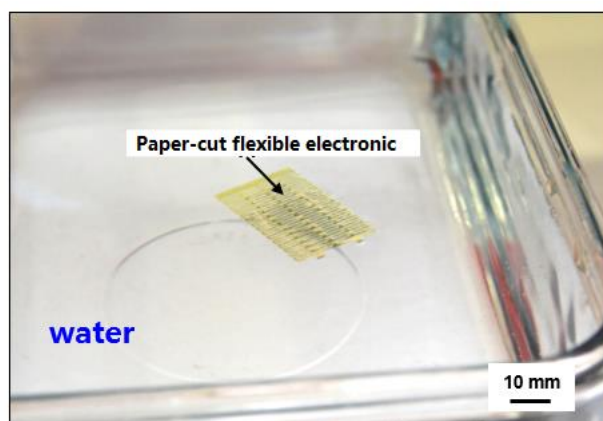

**Figure S1.** The paper-cut flexible electronic floating on the water, indicating its superior lightweight and softness.

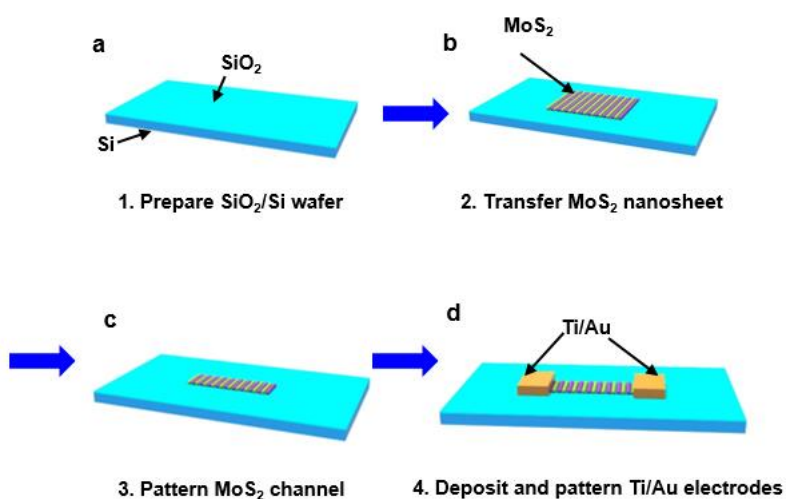

**Figure S2.** The fabrication process of the  $\text{MoS}_2$  based back gate transistor on the rigid substrate: (a) prepare a clean  $\text{SiO}_2/\text{Si}$  substrate. (b) Exfoliate and transfer the  $\text{MoS}_2$  nanosheet on the substrate. (c) Pattern the  $\text{MoS}_2$  active channel. (d) Deposit a Ti/Au layer, followed by patterning into electrodes.

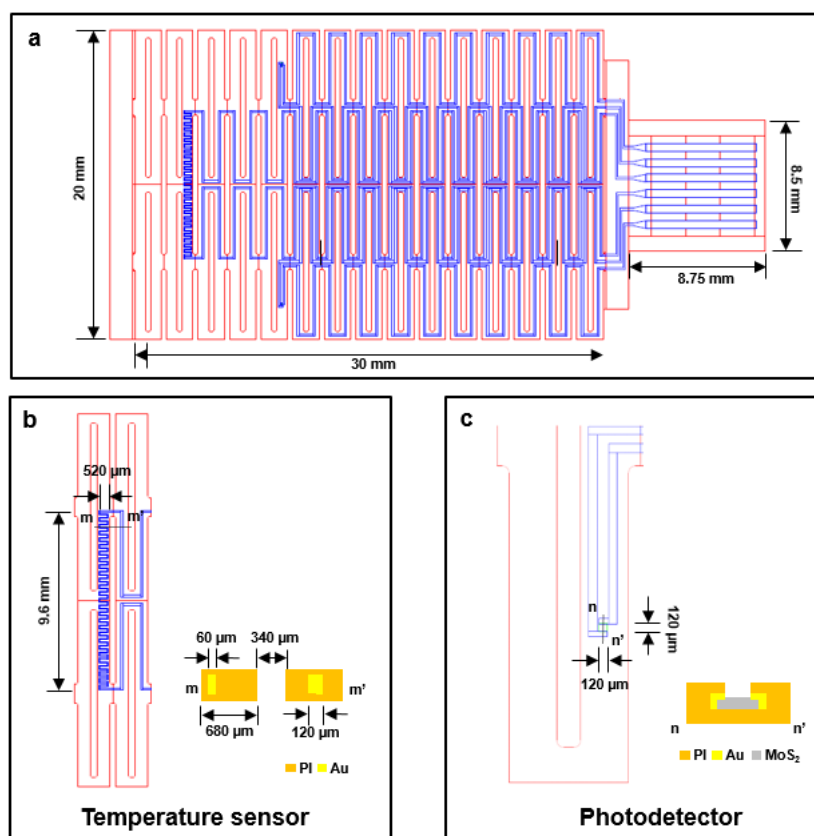

**Figure S3.** Detailed layout of the design: (a) The CAD structure of the system (Blue trace is the metal mesh, red trace is the PI). (b) Detailed design of the temperature sensor, with a cross-section view in the corner. (c) Detailed design of the photodetector, with a cross-section view in the corner.

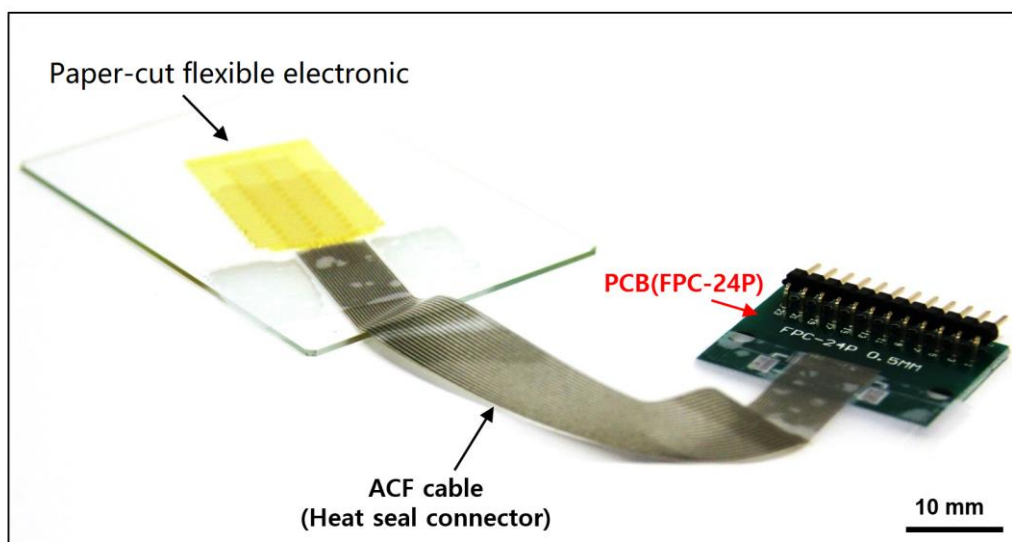

**Figure S4.** The paper-cut flexible electronic is connected with an external PCB(FPC-24P) with a heat seal ACF cable.

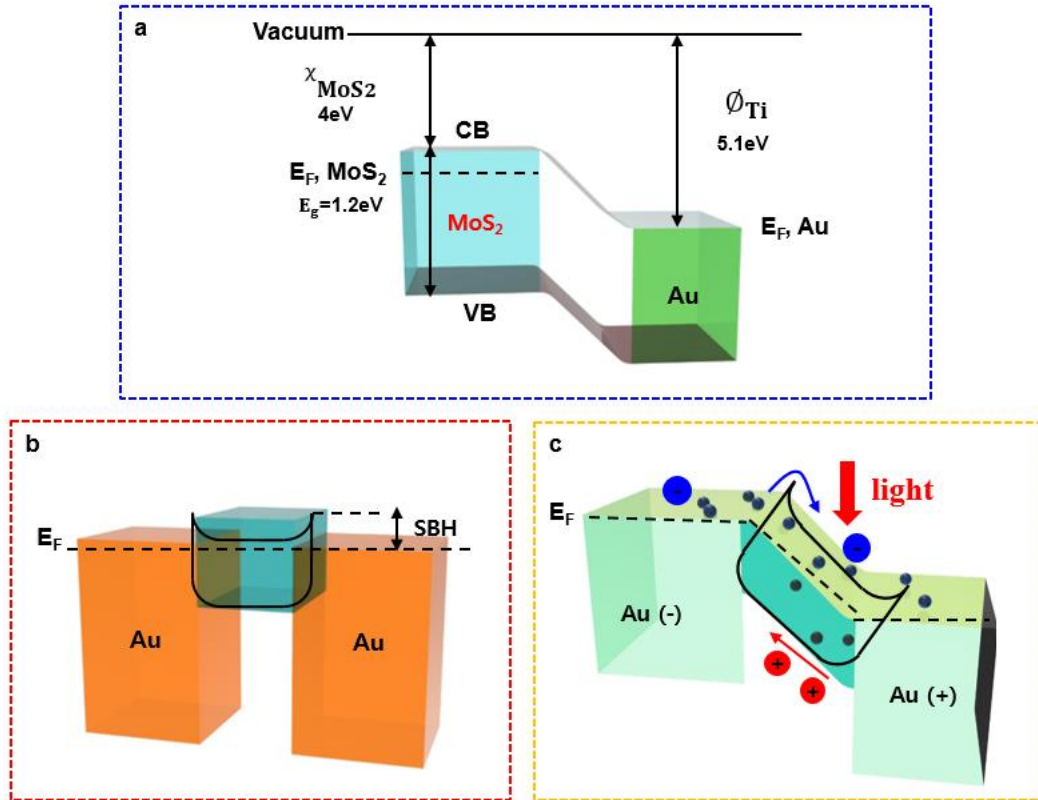

**Figure S5.** The mechanism of the MoS<sub>2</sub> based photodetector: (a) The band diagram of MoS<sub>2</sub> and Au, in correspondence to vacuum level. (b) The band alignment between the two electrodes and the MoS<sub>2</sub> layer. (c) Under a bias, the band bends according to the bias direction so that the electrons excited from the light illumination are moved to the conduction band.

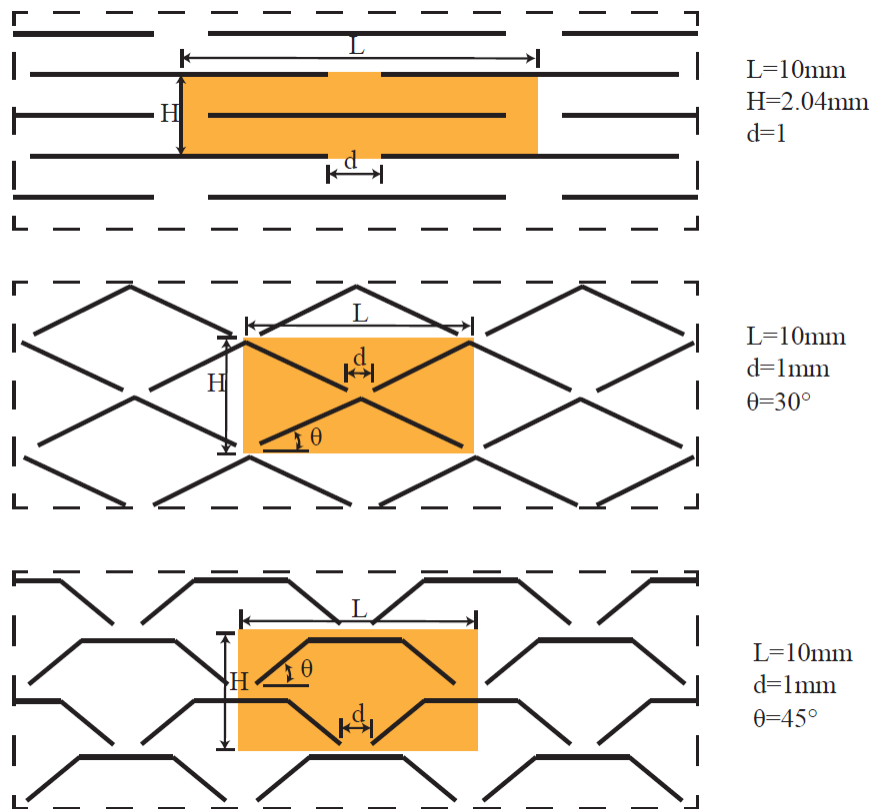

**Figure S6.** The detail geometries of the three different cutting patterns. From top to down: linear, triangle and trapezoidal.

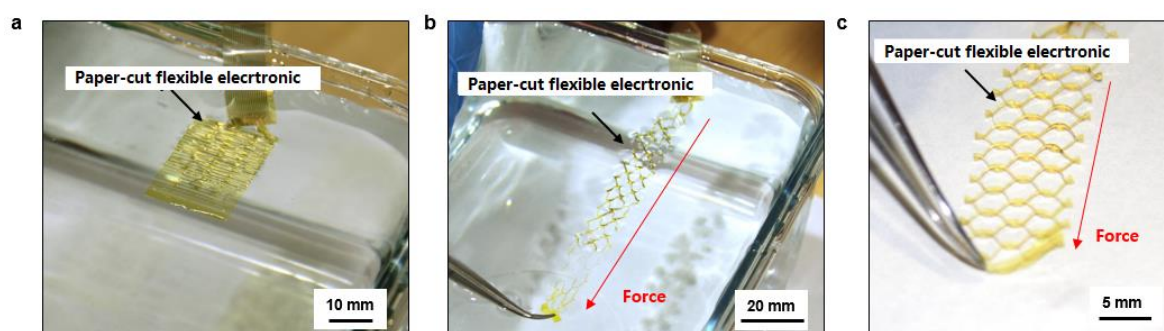

**Figure S7.** Stretching the device on the water with a tweezer: (a) The original state of the device. (b) The stretched device with tensile strain of 300%. (c) Photograph of the top part of the device.

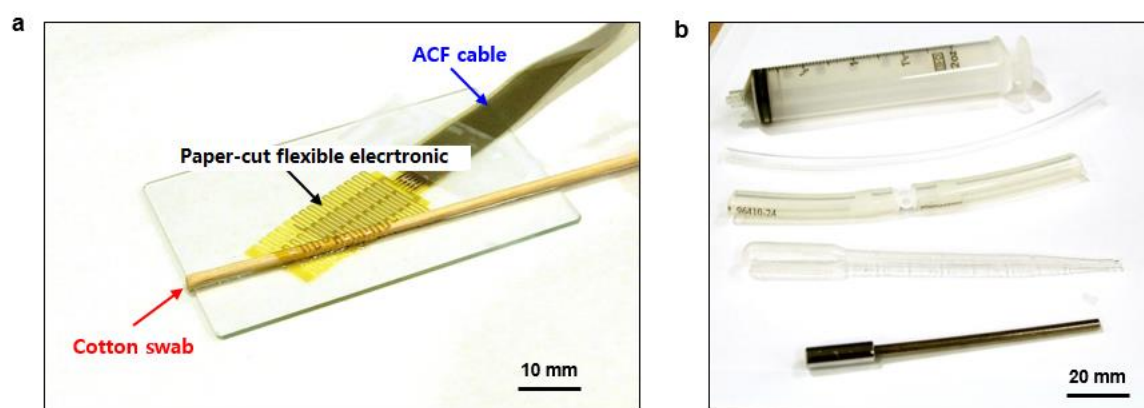

**Figure S8.** The bendability test: (a) Photograph of the device bending on the stick of a cotton swab. (b) Testing with different bending radius.
